# Supplementary material
Source: Springer Nature journal article supplement (https://www.springermedizin.de/resource/supplementary/12874_2010_589_MOESM1_ESM.pdf/9432522)
Supplement: MOESM1 [file 9432522]

**55,002 women** had 1<sup>st</sup> birth during  
01/07/2005 to 31/12/2006

**135,259 hospital records** from  
01/07/2000 – 30/06/2007

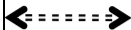

←----- Excluded 1,564 women without corresponding birth admission records -----→

Limited to 5 years before and 42 days after the birth -----→

**53,438 women** with first birth and **113,478 hospital records** (58,209 before birth admission and 53,438 at birth admission including 1,831 transfers prior to discharge)
